# Supplementary material for: Comparison of 7-Year, Real-World Clinical Outcomes between Drug-Coated Balloon Angioplasty versus Drug-Eluting Stent Implantation in Patients with Drug-Eluting Stent In-Stent Restenosis
Source: MDPI journal article supplement (doi:10.3390/jcm12134246), 2023-06-24
Supplement: s1 [file s1]

## Supplementary Data

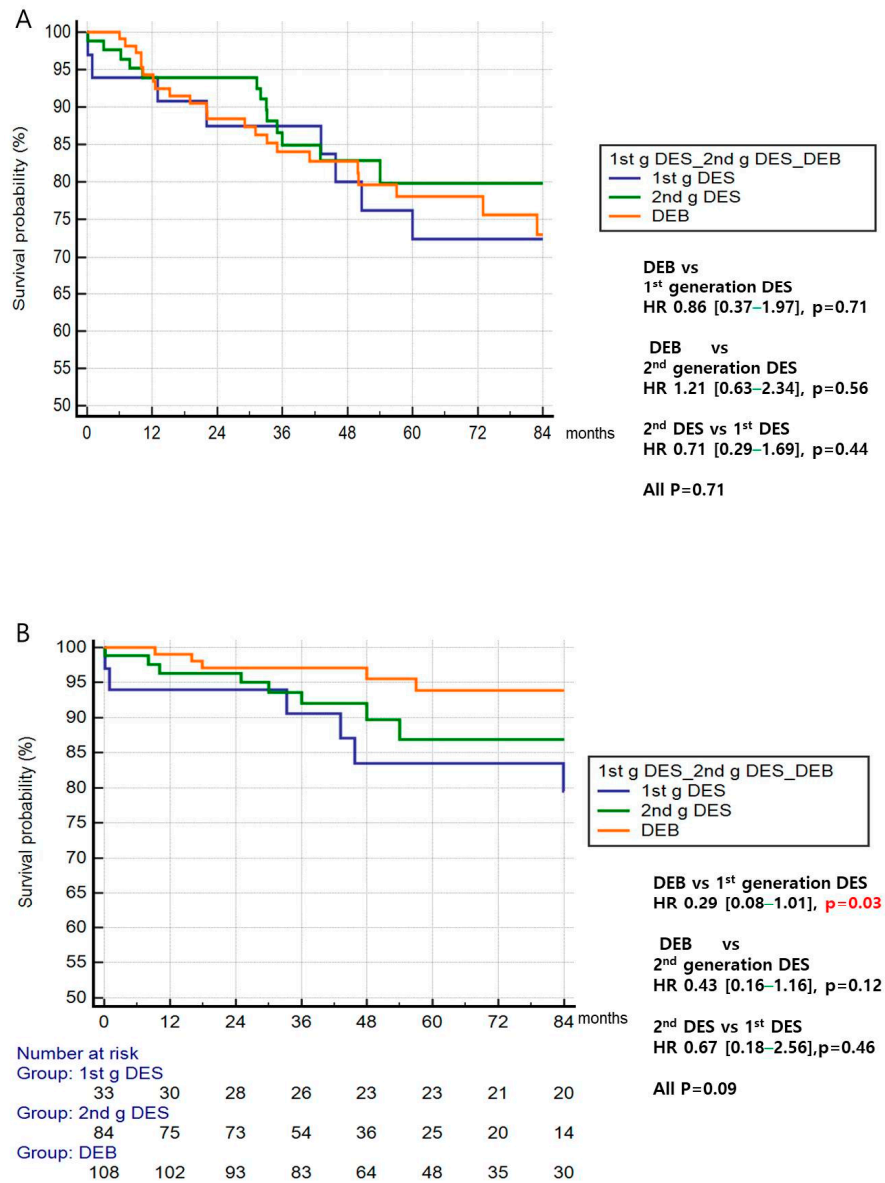

**Figure S1.** Primary endpoints between between DEB, 1st generation DES, and 2nd generation DES groups. **(A).** Primary efficacy endpoint (target lesion revascularization). Cumulative incidence of primary efficacy endpoint between DEB, 1st generation DES, and 2nd generation DES groups. **(B).** Primary safety endpoint (including cardiac death, myocardial infarction, and target lesion thrombosis). Cumulative incidence of primary safety endpoint between DEB, 1st generation DES, and 2nd generation DES groups.

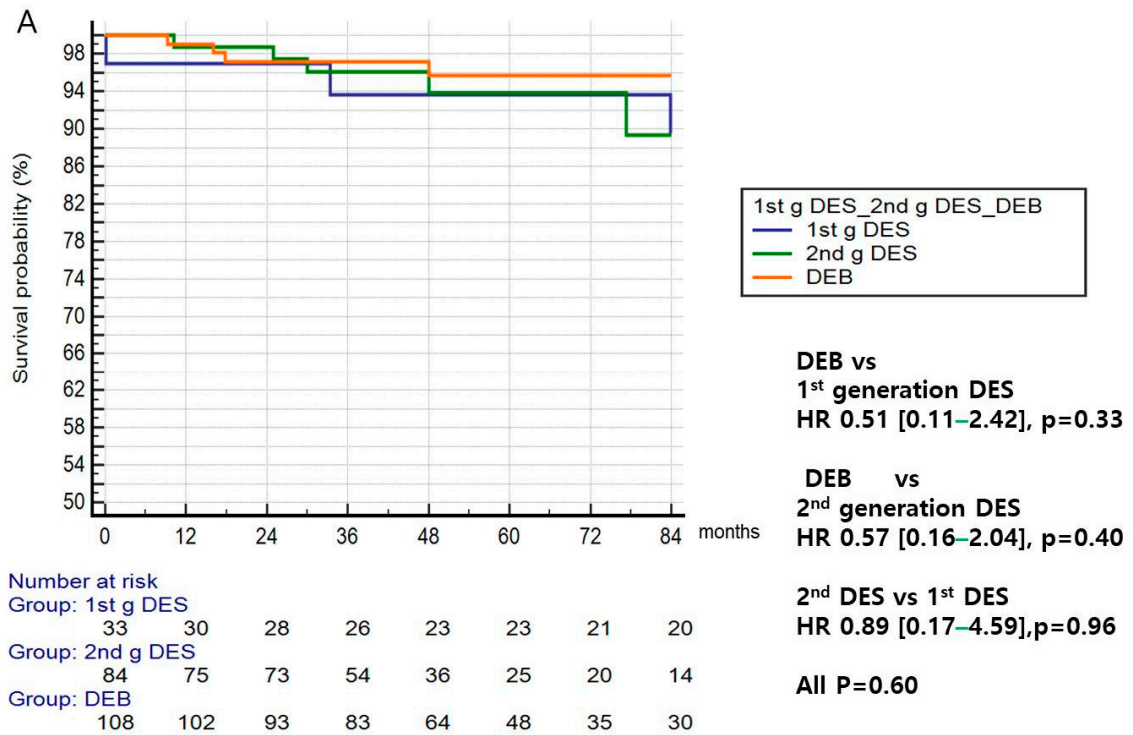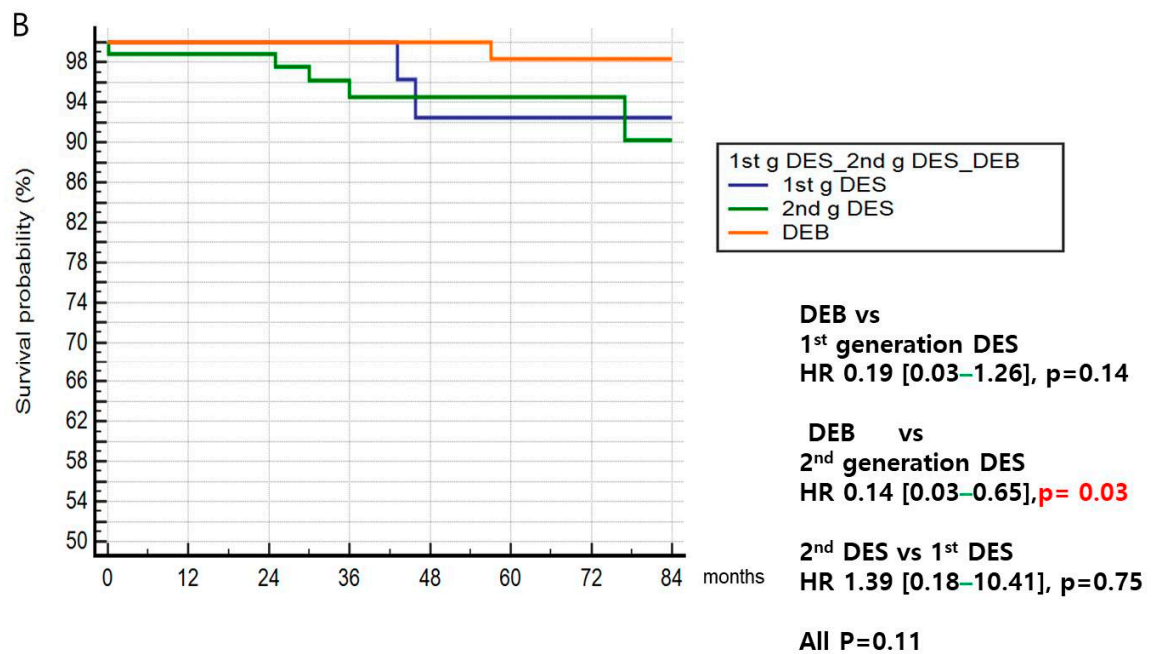

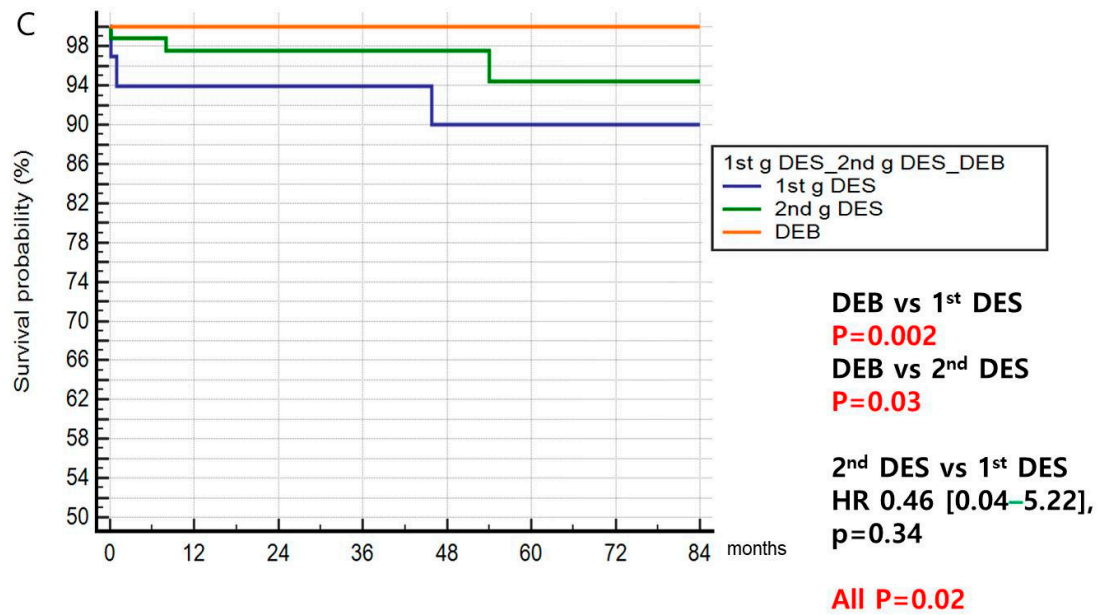

**Figure S2.** Secondary endpoints between between DEB, 1st generation DES, and 2nd generation DES groups. (A). Cardiac death. Cumulative incidence of cardiac death between DEB, 1st generation DES, and 2nd generation DES groups. (B). Myocardial infarction. Cumulative incidence of myocardial infarction between DEB, 1st generation DES, and 2nd generation DES groups. (C). Target lesion thrombosis. Cumulative incidence of target lesion thrombosis between DEB, 1st generation DES, and 2nd generation DES groups.
